## RESEARCH ARTICLE

# The impact of seed burial depths and post-emergence herbicides on seedling emergence and biomass production of wild oat (*Avena fatua* L.): Implications for management

Muhammad Mudassar Maqbool<sup>1\*</sup>, Shazia Naz<sup>1</sup>, Tasneem Ahmad<sup>2</sup>, Muhammad Shahid Nisar<sup>3</sup>, Hassan Mehmood<sup>4</sup>, Mona S. Alwahibi<sup>5</sup>, Jawaher Alkahtani<sup>5</sup>

**1** Department of Agronomy, Faculty of Agricultural Sciences, Ghazi University, Dera Ghazi Khan, Pakistan, **2** Pakki Thatti Research & Development Farm, Toba Tek Singh, Pakistan, **3** Department of Plant Protection, Faculty of Agricultural Sciences, Ghazi University, Dera Ghazi Khan, Pakistan, **4** Department of Soil Science, Bahauddin Zakariya University, Multan, Pakistan, **5** Department of Botany and Microbiology, College of Science, King Saud University, Riyadh, Saudi Arabia

\* [drmudassar93@yahoo.com](mailto:drmudassar93@yahoo.com)

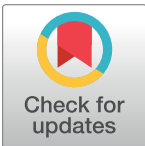

## OPEN ACCESS

**Citation:** Maqbool MM, Naz S, Ahmad T, Nisar MS, Mehmood H, Alwahibi MS, et al. (2020) The impact of seed burial depths and post-emergence herbicides on seedling emergence and biomass production of wild oat (*Avena fatua* L.): Implications for management. PLoS ONE 15(10): e0240944. <https://doi.org/10.1371/journal.pone.0240944>

**Editor:** Shahid Farooq, Harran University, TURKEY

**Received:** September 18, 2020

**Accepted:** October 5, 2020

**Published:** October 28, 2020

**Copyright:** © 2020 Maqbool et al. This is an open access article distributed under the terms of the [Creative Commons Attribution License](https://creativecommons.org/licenses/by/4.0/), which permits unrestricted use, distribution, and reproduction in any medium, provided the original author and source are credited.

**Data Availability Statement:** All relevant data are within the manuscript.

**Funding:** The current study was partially supported by Ghazi University. There was no additional external funding received for this study.

**Competing interests:** The authors have declared that no competing interests exist.

## Abstract

Wheat (*Triticum aestivum* L) is among the most important cereal crops widely cultivated in the world. Wild oat (*Avena fatua* L.) competes with wheat for moisture, sunlight, space and nutrition. The successful management of weeds requires sound knowledge of their biology and response to different herbicides. This study inferred the impact of different constant temperature regimes and seed burial depths on seedling emergence and biomass production of wild oat. Moreover, the impact of different post-emergence herbicides applied at different growth stages on biomass production of wild oat was tested. The influence of different wild oat-wheat density (WWD) combinations on biomass production of wheat and wild oat was also inferred. Different constant temperature regimes significantly altered seed germination and biomass production of wild oat. The highest seed germination percentage and biomass production were noted under 15°C and 20°C, whereas the lowest values were recorded under 30°C. Similarly, days to start emergence, seedling emergence percentage and biomass production of wild oat was significantly affected by different seed burial depths. The lowest and the highest values of these parameters were observed under 4 and 10 cm depth, respectively. Different post-emergence herbicides and wild oat growth stages significantly altered biomass production. The highest reduction in fresh and dry biomass was recorded with herbicides' application at 2–4 leaf stage compared with anthesis stage. Clodinafop resulted in higher reduction of fresh biomass, whereas higher reduction in dry biomass was noted with Sulfosulfuron. Seed germination of both species was not affected by different WWD combinations, except for the treatment where no seed was sown of both species. These results indicate that deep burial of seeds could prevent seedling emergence, whereas post-emergence herbicides must be applied at 2–4 leaf stage of wild oat for its effective management.

## Introduction

Wheat (*Triticum aestivum* L.) gives life to one third of the global population, which consume it as staple food [1]. It is used as staple diet in various countries of the world; thus, ranked among the most important grain crops [2]. Wheat is extensively grown in the world as it was cultivated on 237 million hectares, with 25.19 million tons grain production during 2017–2018 [3]. Wheat occupies a dominant place in agricultural policies [2] and significantly contributes towards gross domestic product and value added in agriculture [2]. The average yield of wheat crop is much lower than its yield potential in many countries of the world [3]. Several biotic and abiotic constraints are responsible for low wheat yield in these countries. Weed infestation causes significant yield reduction, which may reach ~40%. The yield reduction caused due to weed infestation in wheat incurs billions of losses in the world [4].

Weed infestation significantly alters morphological and physiological characteristics of crop plants, which result in significant yield losses [5–7]. The duration and intensity of weed infestation affect the losses caused to crop production. Increasing duration of weed-crop competition poses negative impacts on yield-related attributes of different crops [8–10]. The density of the infesting weeds should be kept below economic threshold level during the critical period of competition [11–13]. Weeds compete with crop plants for resources and this competition significantly reduces yield [7, 9, 14]. The crop yields are reduced by ~50% due to weed infestation under certain circumstances [15]. Therefore, weed management is necessary in field crops to avoid economic losses.

Wild oat (*Avena fatua* L.) is a noxious weed, infesting wheat crop in rainfed and irrigated areas of the world [16–20]. Wild oat causes 20–76% yield losses in wheat crop depending upon the severity and duration of infestation. Different studies have reported that wild oat severely hampers yield components of wheat crop in different regions of the world [11, 21–24]. High temperature reduces seed viability and seed germination percentage of wild oat [25]. Low temperature did not affect the seed viability, although it is a species of semi-arid climates. Moreover, low seed germination under high temperature recruits lower number of seedlings, which ultimately reduces dry biomass production. Integrated weed management practices, including mechanical, chemical and biological methods are recommended for field crops [26–29].

Manual weeding minimizes weed density; however, it incurs heavy labor costs and cannot be useful for farmers. On the other hand, mechanical methods are costly due to high fuel consumption and price [30]. Weed control with herbicides is quite effective and cheaper than the rest of the weed control methods [31–33]. However, increasing environmental and human health concerns on herbicides are being discussed in the recent era [34, 35]. Post emergence herbicides are an effective tool to lower weed-crop competition. Several herbicides are available, which can control wild oat [36, 37]. The herbicides are becoming ineffective due to the evolution of herbicide resistance [38]. Numerous studies have reported that herbicides application lowered weed infestation and increased wheat yield [4, 36].

Proper and effective management of wild oat is essential as it severely competes with wheat plants after its emergence. Successful management of any weed species requires sound knowledge of species' biology, ecology, germination and emergence patterns and response to applied herbicides. Therefore, current study was designed to explore the impact of different constant temperature regimes and seed burial depths on seed germination and seedling emergence of wild oat. The second aim of the study was to explore the effect of different post emergence herbicides and WWD combinations on biomass production of wild oat. The results of the study will contribute towards the development of effective management strategies against wild oat.

## Materials and methods

One laboratory and three greenhouse experiments were performed to infer the impact of constant temperature regimes, seed burial depths, post emergence herbicides and WWD combinations on seed germination and seedling emergence and biomass production of wild oat.

### Seed collection

Wild oat seeds were collected from the wheat field in Dera Ghazi Khan. The seeds were stored at room temperature and used in the experiments. The seeds of wheat cultivar Ujala were collected from Ayub Agriculture Research Institute, Faisalabad. The seed collection required no permission and did not involve any endangered species.

### Experiment 1: Effect of different constant temperature regimes on seed germination of wild oat

Seed germination of wild oat was recorded under five different constant temperature regimes (i.e., 10, 15, 20, 25 and 30°C). The experiment was conducted in automated incubators under laboratory conditions. The germination was assessed in Petri dishes (90 × 15 mm), having two layers of Whatman No. 1 filter paper. Deionized water was used to provide the required moisture to the seeds. Two Petri dishes were considered as one replication and 25 seeds were placed in each Petri dish. All temperature regimes were replicated four times. Incubators were adjusted at the desired temperatures and seeds were incubated. Germination was evaluated 21 days after experiment initiation [39, 40].

### Experiment 2: Effect of seed burial depths on seedling emergence of wild oat

Seedling emergence of wild oat was recorded from four different seed burial depths (i.e., 4, 6, 8 and 10 cm) to infer the seed burial depth required for ceasing seedling emergence. The experiment was conducted in pots. The same sized seeds of wild oat were sown in the pots at the prescribed burial depths. The seeds were placed at equal distance in the pots to ensure that the seeds not face any competition in germination. Free draining, 8.8 liter pots were used in the study, which were filled with 2.7 kg of soil [41].

### Experiment 3: Effect of different wild oat-wheat densities on the growth of each other

Five different wild oat-wheat density (WWD) combinations were evaluated for their impact on seed germination and biomass production of both species. Seeding density of both species was kept inversely proportional to each other in WWD combinations. The WWD combinations were 0:8, 2:6, 4:4, 6:2 and 0:8 (wild oat:wheat). Free draining, 8.8 liter pots were used in the study. The pots were filled with 2.7 kg of soil and then seedlings were transplanted.

### Experiment 4: Effect of post-emergence herbicides on biomass production of wild oat

Efficacy of two post-emergence herbicides on biomass production of wild oat was tested. The experiment included two different factors, i.e., post-emergence herbicides and growth stages of wild oat. Two different post-emergence herbicides, i.e., Clodinofof and Sulfosulfuron at recommended doses (400 g ha<sup>-1</sup> for Clodinofof and 35 g ha<sup>-1</sup> for Sulfosulfuron) were tested,

while distilled water was applied in the control treatment. These herbicides were applied at two different growth stages, i.e., 2–4 leaf and anthesis stage of wild oat.

### Experimental setup and design

The experiments 1–3 were conducted according to completely randomized design with four replications. The experiment 4 was conducted according to randomized complete block design with split plot arrangements. Post-emergence herbicides were kept in main plot, while growth stages of wild oat were regarded as sub-plots. All experiments were repeated over time (two experimental runs for each experiment).

### Data collection

Seed germination (experiment 1 and 3) and seedling emergence (experiment 2) was recorded daily and terminated 21 days after the start of experiments. Visible appearance of the cotyledon was taken as criterion for seed germination and seedling emergence. The day at which first seedling emerged was considered as days to start emergence. The percentage of the emerged seedlings was computed using the following equation;

$$\text{Seedling emergence (\%)} = \frac{\text{Total number of seedlings emerged}}{\text{Total number of seeds sown}} \times 100$$

All seedlings were taken off from the pots at the termination of experiments, divided into shoots and roots, weighed fresh and dried in an oven at 70°C for 72 hours. The dried roots and shoots were weighed to record root and shoot dry weight  $\text{pot}^{-1}$ .

### Statistical analysis

The data of all experiments were analyzed and interpreted separately. The differences among experimental runs were tested by paired *t* test, which were non-significant. Therefore, data of both experimental runs were pooled. The collected data were subjected to Fisher's Analysis of Variance (ANOVA) (one-way for experiment 1, 2 and 4 and 2-way for experiment 3) technique [42]. The normality in the data was tested prior to ANOVA by Shapiro-Wilk normality test [43] and parameters showing non-normal distribution were transformed using arcsine transformation techniques to meet the normality assumption. The treatment means were compared by least significant difference test at 95% probability level where ANOVA indicated significance. The ANOVA was performed on SPSS version 21.0 [44].

## Results

### Experiment 1: Effect of different constant temperature regimes on seed germination of wild oat

Different constant temperature regimes significantly altered days to start emergence (DE), seed germination percentage (G%) and fresh and dry biomass of wild oat (Table 1). The DE were initially reduced with increasing temperature and then an increase was recorded. The lowest number of DE were taken by the seeds incubated under 15°C and 20°C, whereas the highest DE were taken by the seeds incubated at 30°C (Fig 1A).

The G% was increased with increasing temperature up to 20°C and then declined. The highest G% was noted under 15°C and 20°C, while the lowest was recorded under 10°C and 30°C (Fig 1B). Seedling fresh weight was increased with increasing temperature until 20°C and then a constant reduction was noted. The highest and the lowest seedling fresh weight was noted under 20°C and 30°C, respectively (Fig 1C). Seedling dry weight increased

**Table 1. Analysis of variance for days to start emergence, seed germination percentage and seedling fresh and dry biomass of wild oat under different constant temperature regimes.**

| Source                             | DF | Sum of squares | Mean squares | F value | P value |
|------------------------------------|----|----------------|--------------|---------|---------|
| <b>Days to start emergence</b>     |    |                |              |         |         |
| Temperature regimes                | 4  | 19.30          | 4.82         | 28.95   | 0.0000* |
| Error                              | 15 | 2.50           | 0.16         |         |         |
| Total                              | 19 | 21.80          |              |         |         |
| <b>Seed germination percentage</b> |    |                |              |         |         |
| Temperature regimes                | 4  | 2482.50        | 620.62       | 67.70   | 0.0000* |
| Error                              | 15 | 137.50         | 9.16         |         |         |
| Total                              | 19 | 2620.00        |              |         |         |
| <b>Seedling fresh weight</b>       |    |                |              |         |         |
| Temperature regimes                | 4  | 147.70         | 36.92        | 146.24  | 0.0000* |
| Error                              | 15 | 3.78           | 0.25         |         |         |
| Total                              | 19 | 151.49         |              |         |         |
| <b>Seedling dry weight</b>         |    |                |              |         |         |
| Temperature regimes                | 4  | 40.28          | 10.07        | 235.93  | 0.0000* |
| Error                              | 15 | 0.64           | 0.04         |         |         |
| Total                              | 19 | 40.92          |              |         |         |

DF = degree of freedom

\* = significant

<https://doi.org/10.1371/journal.pone.0240944.t001>

with increasing temperature until 20°C and then a constant reduction was noted. The highest and the lowest seedling dry weight was noted under 20°C and 30°C, respectively (Fig 1D).

### Experiment 2: Effect of seed burial depths on seedling emergence of wild oat

Different seed burial depths significantly altered DE, final emergence percentage (FEP) and fresh and dry biomass production of roots and shoots (Table 2). Increasing seed burial depth increased DE. The highest number of DE (10.50) were taken under 10 cm seed burial depth, whereas the lowest (4.25) DE was recorded for 4 cm burial depth (Fig 2A). The FEP was linearly decreased with increasing seed burial depth. The highest FEP (87.75%) was recorded under shallow depth, i.e., 4 cm, whereas the lowest FEP (20.00%) was recorded for the deepest seed burial treatment, i.e., 10 cm (Fig 2B).

The highest fresh shoot biomass (25.07 g pot<sup>-1</sup>) was recorded under 4 cm seed burial depth, whereas the lowest (7.74 g pot<sup>-1</sup>) was noted under 10 cm (Fig 2C). Dry shoot biomass production linearly decreased with increasing seed burial depth. The highest dry shoot biomass (9.63 g pot<sup>-1</sup>) was recorded under 4 cm, whereas the lowest (3.77 g pot<sup>-1</sup>) was observed under 10 cm seed burial depth (Fig 2D).

Fresh root biomass production linearly decreased with increasing seed burial depth. The highest fresh root biomass (11.47 g pot<sup>-1</sup>) was recorded under 4 cm seed burial depth, whereas the lowest (4.17 g pot<sup>-1</sup>) was noted under 10 cm seed burial depth (Fig 2E). Dry root biomass production linearly decreased with increasing seed burial depth. The highest dry root biomass (5.63 g pot<sup>-1</sup>) was recorded under 4 cm seed burial depth, whereas the lowest (2.52 g pot<sup>-1</sup>) was observed under 10 cm seed burial depth (Fig 2F).

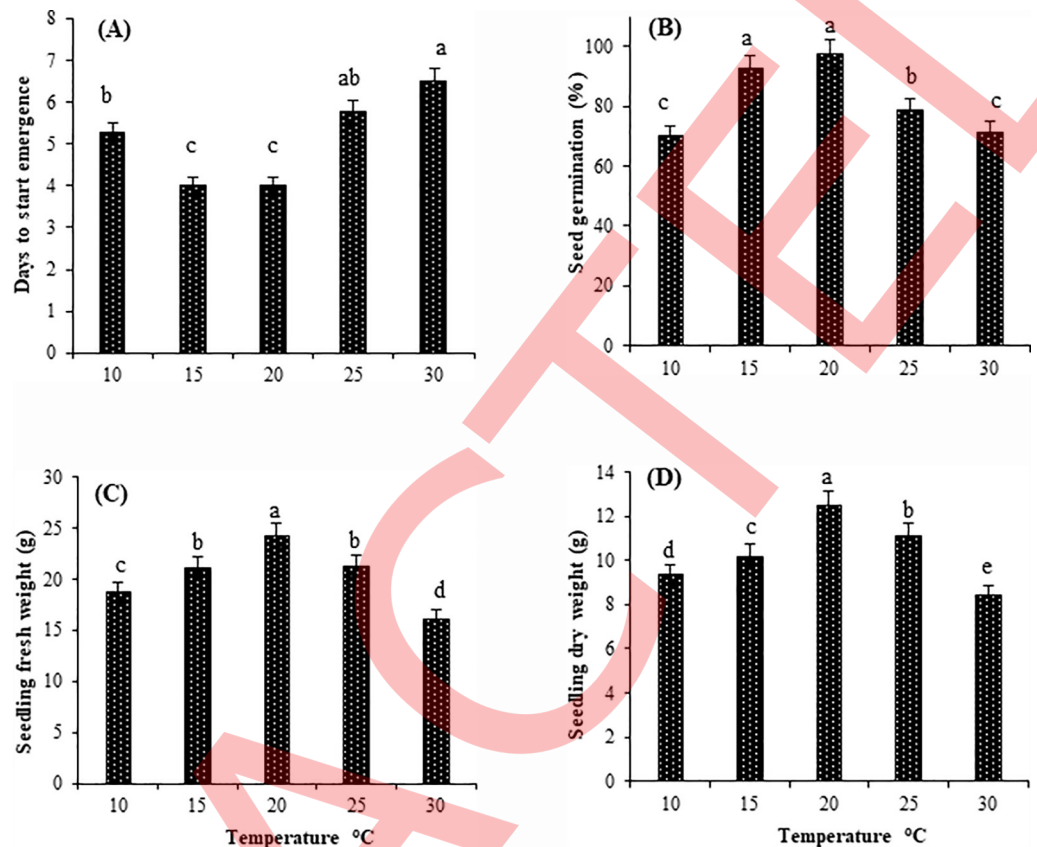

**Fig 1.** The effect of different constant temperature regimes on days to start emergence (A), seed germination percentage (B), seedling fresh weight (C) and seedling dry weight (D) of wild oat.

<https://doi.org/10.1371/journal.pone.0240944.g001>

### Experiment 3: Effect of different wild oat-wheat densities on the growth of each other

Different wild oat-wheat density (WWD) combinations significantly altered seed germination and biomass production of both species and number of tillers per plant of wheat (Table 3). Seed germination of wheat remained same under all WWD combinations except 8:0 (Fig 3A).

Fresh and dry biomass production of wheat decreased with increasing wild oat density and decreasing wheat density. The highest fresh and dry biomass production of wheat were recorded under 0:8 (0 wild oat seeds and 8 wheat seeds), whereas the lowest fresh and dry biomass production were recorded for 8:0 (Fig 3C and 3D). Number of tillers per plant decreased with increasing wild oat density and decreasing wheat density. The highest number of tillers per plant was recorded under 0:8, whereas the lowest was recorded for 8:0 (Fig 3B).

Seed germination of wild oat remained same under all density combinations except 0:8 (0 seeds per pot of wild oat and 8 seeds of wheat). These results indicated that different WWD combinations did not affect the seed germination of wild oat (Fig 4A).

Fresh biomass of wild oat decreased with increasing wheat density and decreasing wild oat density. The highest fresh biomass was recorded under 8:0 (8 wild oat seeds and 0 wheat seeds), whereas the lowest was noted for 0:8 (Fig 4B). Dry biomass decreased with increasing wheat density and decreasing wild oat density. The highest dry biomass production was recorded under 8:0 (Fig 4C).

Table 2. Analysis of variance for days to start emergence, root and shoot fresh and dry biomasses of wild oat under different seed burial depths.

| Source                               | DF | Sum of squares | Mean squares | F value | P value |
|--------------------------------------|----|----------------|--------------|---------|---------|
| <b>Days to start emergence</b>       |    |                |              |         |         |
| Seed burial depths                   | 3  | 86.50          | 28.83        | 98.86   | 0.0000* |
| Error                                | 12 | 3.50           | 0.29         |         |         |
| Total                                | 15 | 90.00          |              |         |         |
| <b>Seedling emergence percentage</b> |    |                |              |         |         |
| Seed burial depths                   | 3  | 9993.50        | 3331.17      | 1095.18 | 0.0000* |
| Error                                | 12 | 36.50          | 3.04         |         |         |
| Total                                | 15 | 10030.00       |              |         |         |
| <b>Shoot fresh weight</b>            |    |                |              |         |         |
| Seed burial depths                   | 3  | 682.38         | 227.46       | 757.74  | 0.0000* |
| Error                                | 12 | 3.60           | 0.30         |         |         |
| Total                                | 15 | 685.98         |              |         |         |
| <b>Shoot dry weight</b>              |    |                |              |         |         |
| Seed burial depths                   | 3  | 73.80          | 24.60        | 187.82  | 0.0000* |
| Error                                | 12 | 1.57           | 0.13         |         |         |
| Total                                | 15 | 75.37          |              |         |         |
| <b>Root fresh weight</b>             |    |                |              |         |         |
| Seed burial depths                   | 3  | 118.60         | 39.60        | 455.41  | 0.0000* |
| Error                                | 12 | 1.07           | 0.08         |         |         |
| Total                                | 15 | 119.85         |              |         |         |
| <b>Root dry weight</b>               |    |                |              |         |         |
| Seed burial depths                   | 3  | 21.39          | 7.13         | 59.37   | 0.0000* |
| Error                                | 12 | 1.44           | 0.12         |         |         |
| Total                                | 15 | 22.83          |              |         |         |

DF = degree of freedom

\* = significant

<https://doi.org/10.1371/journal.pone.0240944.t002>

### Experiment 4: Effect of post emergence herbicides on biomass production of wild oat

Different growth stages of wild oat did not affect the fresh biomass production; however, it was significantly altered by different post-emergence herbicides and growth stages by post-emergence herbicides' interactions (Table 4). Different post-emergence herbicides reduced fresh biomass and application at 2–4 leaf stage resulted in higher reduction of fresh biomass. The highest fresh biomass was observed at 2–4 leaf growth stage with control treatment of the study. The lowest fresh biomass was noted for Clodinafop applied at 2–4 leaf stage. Overall, Clodinafop better suppressed the fresh biomass compared to Sulfosulfuron (Fig 5A).

Different growth stages, post-emergence herbicides and growth stages by post-emergence herbicides' interactions significantly altered dry biomass production of wild oat (Table 4). Herbicide application at 2–4 leaf stage resulted in higher reduction of dry biomass. The highest dry biomass was observed at 2–4 leaf growth stage with control treatment. The lowest dry biomass was noted for Sulfosulfuron applied at 2–4 leaf stage. Overall, Sulfosulfuron better suppressed dry biomass compared to Clodinafop (Fig 5B).

### Discussion

Seed germination percentage is an important ecological trait defining the establishment success and failure of wild and cultivated plant species. Higher seed germination percentage

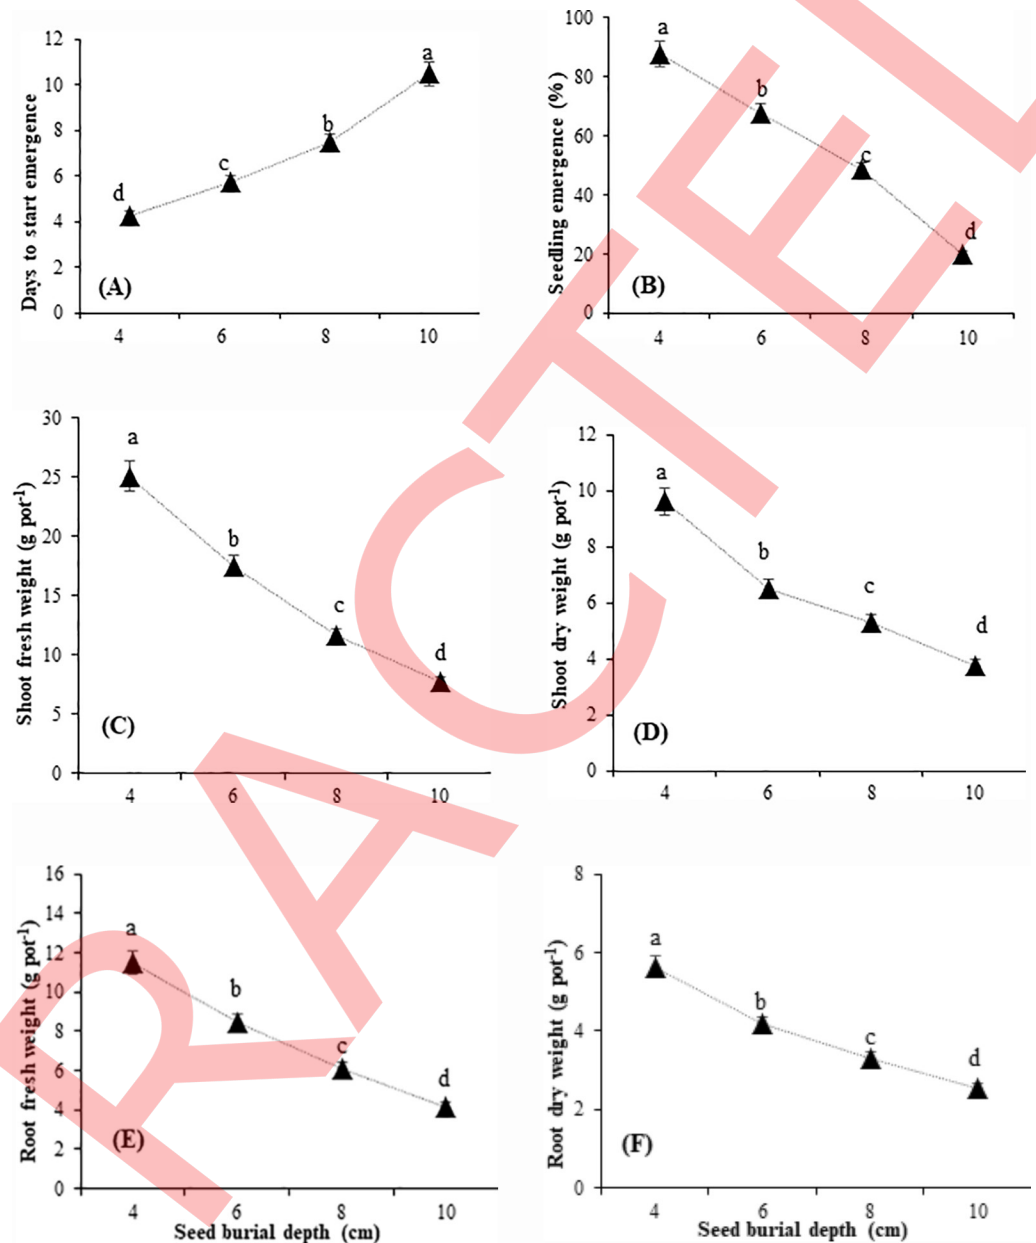

**Fig 2.** The effect of different seed burial depths on days to start emergence (A), seedling emergence percentage (B), shoot fresh weight (C), shoot dry weight (D), root fresh weight (E) and root dry weight (F) of wild oat.

<https://doi.org/10.1371/journal.pone.0240944.g002>

ensures better plant population. Temperature is an imperative determinant of seed germination and different seeds germinate at a specific temperature range. Seed germination percentage determines the density of a species in field. Higher seed germination guarantees high density, whereas species having low seed germination end with low density. Numerous factors alter the seed germination of weed species. These factors include temperature, light, soil pH, osmotic potential, hormones and seed burial depth. Among these factors, temperature affects several hormones playing role in seed germination [39, 40, 45–48]. Different species, and even the populations of same species have specific temperature requirements for seed germination [49, 50].

**Table 3. Analysis of variance for seed germination percentage and fresh and dry biomasses of wild oat and wheat and number of tillers per plant of wheat under different wild oat-wheat density combinations.**

| Source                                        | DF | Sum of squares | Mean squares | F value | P value |
|-----------------------------------------------|----|----------------|--------------|---------|---------|
| <b>Seed germination percentage (wheat)</b>    |    |                |              |         |         |
| Density combinations                          | 4  | 28169.40       | 7042.36      | 48.10   | 0.0000* |
| Error                                         | 15 | 2196.40        | 146.43       |         |         |
| Total                                         | 19 | 30365.80       |              |         |         |
| <b>Number of tillers per plant (wheat)</b>    |    |                |              |         |         |
| Density combinations                          | 4  | 254.80         | 63.70        | 123.29  | 0.0000* |
| Error                                         | 15 | 7.75           | 0.51         |         |         |
| Total                                         | 19 | 262.55         |              |         |         |
| <b>Fresh weight (wheat)</b>                   |    |                |              |         |         |
| Density combinations                          | 4  | 42287.40       | 10571.80     | 1559.61 | 0.0000* |
| Error                                         | 15 | 101.70         | 6.80         |         |         |
| Total                                         | 19 | 42389.10       |              |         |         |
| <b>Dry weight (wheat)</b>                     |    |                |              |         |         |
| Density combinations                          | 4  | 4311.97        | 1077.99      | 1169.29 | 0.0000* |
| Error                                         | 15 | 13.83          | 0.92         |         |         |
| Total                                         | 19 | 4325.80        |              |         |         |
| <b>Seed germination percentage (wild oat)</b> |    |                |              |         |         |
| Density combinations                          | 4  | 27588.40       | 6897.09      | 32.64   | 0.0000* |
| Error                                         | 15 | 3169.50        | 211.30       |         |         |
| Total                                         | 19 | 30757.90       |              |         |         |
| <b>Fresh weight (wild oat)</b>                |    |                |              |         |         |
| Density combinations                          | 4  | 26966.70       | 6741.69      | 2931.04 | 0.0000* |
| Error                                         | 15 | 34.50          | 2.30         |         |         |
| Total                                         | 19 | 27001.20       |              |         |         |
| <b>Dry weight (wild oat)</b>                  |    |                |              |         |         |
| Density combinations                          | 4  | 4276.73        | 1069.18      | 1693.65 | 0.0000* |
| Error                                         | 15 | 9.47           | 0.63         |         |         |
| Total                                         | 19 | 4286.20        |              |         |         |

DF = degree of freedom

\* = significant

<https://doi.org/10.1371/journal.pone.0240944.t003>

Temperature is an important ecological factor affecting the seed germination by activating different enzymes [39, 40, 45–48]. High temperature reduces seed viability and germination percentage of wild oat [25]. Wild oat shows higher seed germination during spring compared to the autumn season [25]. Wild oat germinates under a wide range of temperature regimes (5–30°C). However, several studies have reported that the optimum temperature for the seed sprouting of wild oat is 15–20°C [25]. Like other species, wild oat has a specific soil temperature requirement for seed germination [51]. Seed germination of wild oat starts once the soil temperature is raised 4–8°C and continues until 17°C. Beyond this temperature, seed germination slows down and ultimately ceases with further increase in temperature. The low dry biomass under high temperature in the current study can be explained by the lower temperature requirement of wild oat seeds for germination. Moreover, the lesser number of germinated seeds produced lesser seedlings, which ultimately resulted in low dry biomass Hassanein et al. [52] indicated that wild oat exhibits highest seed germination under 20°C, while produced the highest seedling dry weight under 25°C.

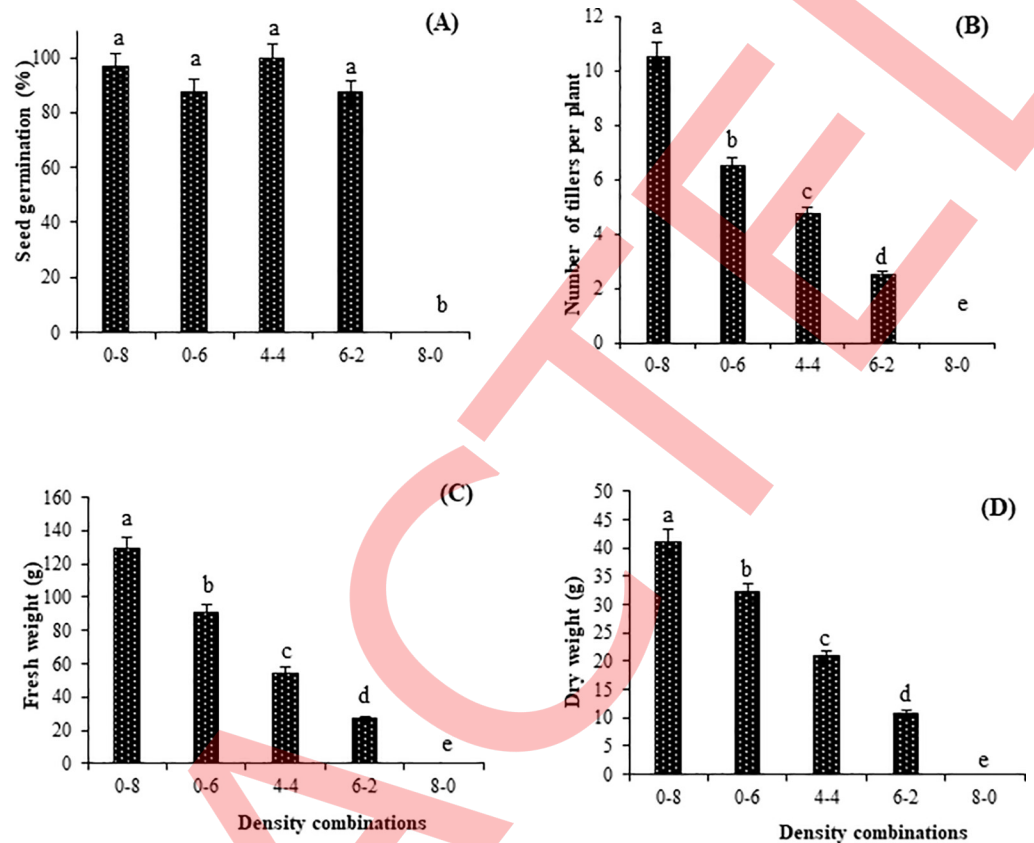

**Fig 3.** The effect of different wild oat and wheat density combinations on seed germination (A), number of tillers per plant (B), fresh weight (C) and dry weight (D) of wheat.

<https://doi.org/10.1371/journal.pone.0240944.g003>

The optimum time to control wild oat is at 2–3 seedlings/m<sup>2</sup> [53]. Different plant species exhibit differential requirements for optimum root growth mainly due to the nature of seeds and the environmental conditions faced by the seeds during seed germination [54]. Nonetheless, seedling emergence is hindered by lesser light diffusion in the deeper soil layers [55, 56], which results in poor root development. The viability of the seeds is increased when buried under shallow depth, whereas it is decreased when buried at deeper depths. The lesser light diffusion and reduced respiration are responsible for the reduced seed viability. It has been observed that seed viability and root growth of wild oat is decreased with increasing seed burial depth [57]. Therefore, the decreased root biomass with increasing seed burial depth is the collective result of less light diffusion, high mechanical impedance offered by the soil and decreased seed viability.

The cultural or mechanical weed control methods are less effective for wild oat compared to chemical control, which is the most effective for wild oat management [58, 59]. The urea family and phenoxypropionates herbicides are considered the most effective chemical control of wild oat. An extensive review has suggested that numerous herbicides are effective in controlling wild oat compared to the other methods [60]. These herbicides are effective when applied alone or in combination with other herbicides or adjuvants. Different herbicides which can effectively control wild oat are; atrazine, benzoilprop-ethyl, chlorsulfuron, chlorotoluron, clodinafop, cycloxydim, diclofop-methyl, difenzoquat, diflufenican, dimethenamid + trifluralin, fenoxaprop-ethyl and flumprop-isopropyl [25]. The higher reduction in fresh

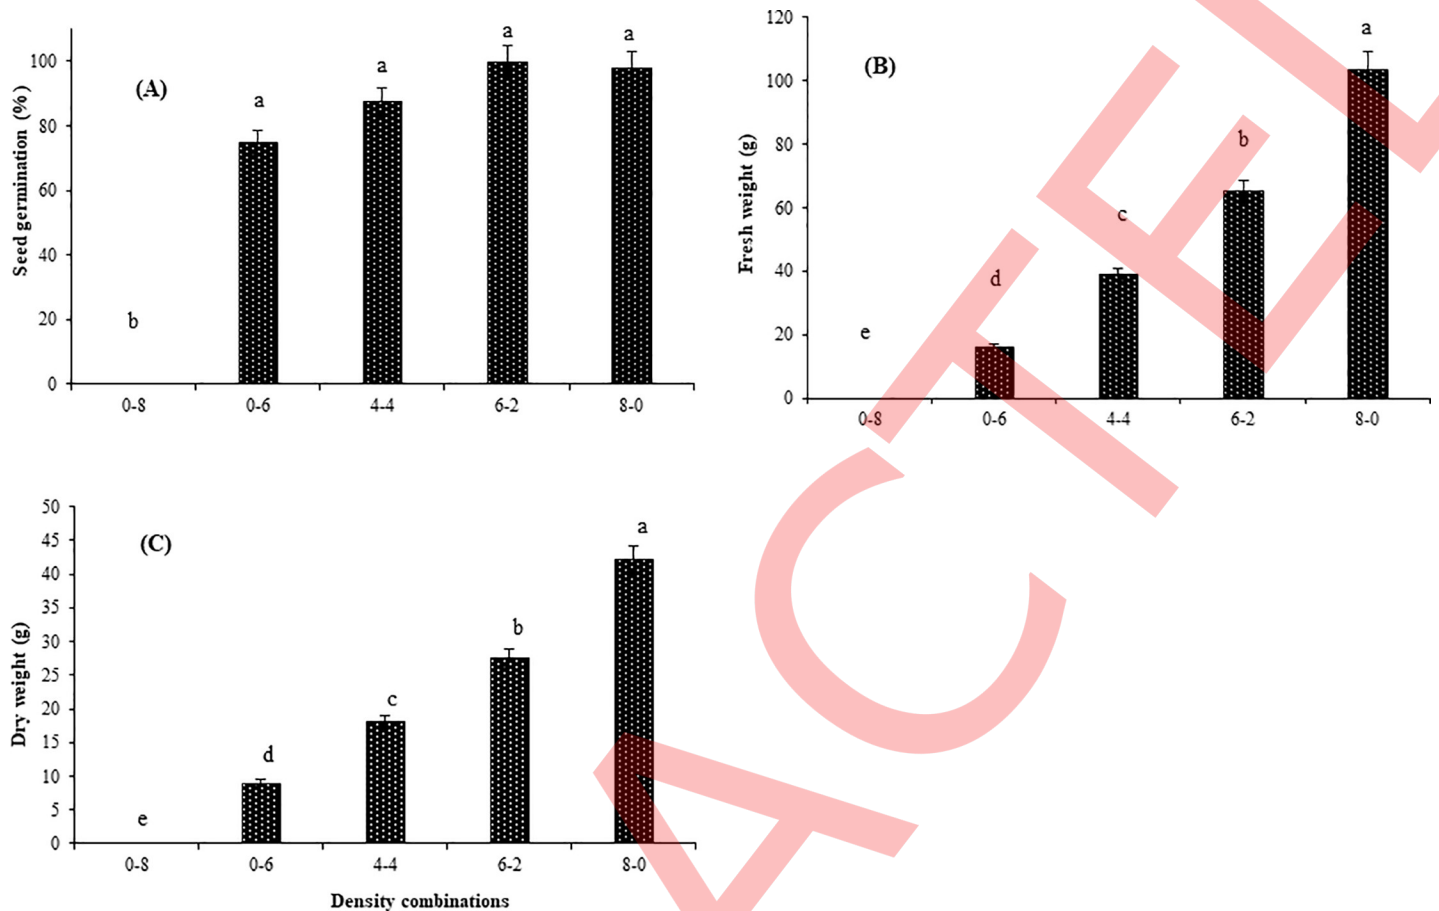

**Fig 4.** The effect of different wild oat and wheat density combinations on seed germination (A), fresh weight (B) and dry weight (C) of wild oat.

<https://doi.org/10.1371/journal.pone.0240944.g004>

weight at 2–4 leaf growth stage indicated that wild oat gives better response to applied herbicides at initial stage compared to later stages.

The density of weeds and crop plants significantly affect the seed germination and growth traits of both species. The higher seed density of weed species negatively affect the seed germination and subsequent growth of crop plants. Moreover, higher seed density results in higher

**Table 4.** Analysis of variance for and fresh and dry biomass of wild oat under different post-emergence herbicides' application.

| Source               | DF | Sum of squares | Mean squares | F value | P value            |
|----------------------|----|----------------|--------------|---------|--------------------|
| <b>Fresh biomass</b> |    |                |              |         |                    |
| Growth Stage (G)     | 1  | 4.62           | 4.62         | 8.31    | 0.06 <sup>NS</sup> |
| Herbicides (H)       | 2  | 229.04         | 114.52       | 131.13  | 0.000*             |
| G × H                | 2  | 27.40          | 13.72        | 15.71   | 0.000*             |
| <b>Dry biomass</b>   |    |                |              |         |                    |
| Growth Stage (G)     | 1  | 27.26          | 27.26        | 75.35   | 0.003*             |
| Herbicides (H)       | 2  | 158.01         | 79.00        | 785.79  | 0.000*             |
| G × H                | 2  | 20.01          | 10.00        | 99.54   | 0.000*             |

DF = degree of freedom

\* = significant

<https://doi.org/10.1371/journal.pone.0240944.t004>

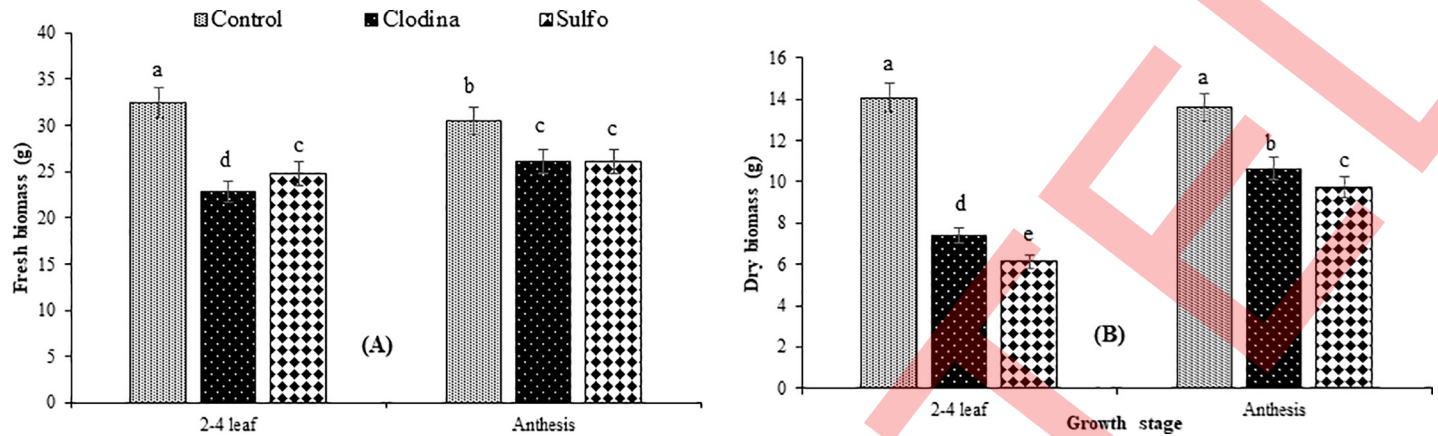

**Fig 5.** The effect of different post-emergence herbicides on fresh biomass (A) and dry biomass production (B) of wild oat.

<https://doi.org/10.1371/journal.pone.0240944.g005>

weed density in crop plants, which exerts serious negative impacts on crop yield. Seed germination of wheat was affected by increasing WWD and vice versa. This reduction in seed germination is the result of increase weed-crop competition, which reduced the seed germination percentage. Moreover, this weed-crop competition is depicted in growth and development as well.

## Conclusion

Seed germination of wild oat is stimulated when temperature reaches 10°C; therefore, management strategies should be started once the soil temperature reaches 10°C. Increasing seed burial depth suppresses the seedling emergence of wild oat; therefore, burying wild oat seeds >10 cm deep and subsequent shallow tillage along with the management of emerging seedlings could be a viable management option. Wild oat better responded to applied herbicides at 2–4 leaf stage compared to anthesis stage; therefore, herbicides must be applied at 2–4 leaf stage for effective management.

## Acknowledgments

The authors extend their appreciation to the Researchers supporting project number (RSP-2020/193) King Saud University, Riyadh, Saudi Arabia.

## Author Contributions

**Conceptualization:** Muhammad Mudassar Maqbool.

**Data curation:** Shazia Naz.

**Formal analysis:** Shazia Naz.

**Funding acquisition:** Muhammad Mudassar Maqbool.

**Investigation:** Shazia Naz.

**Resources:** Muhammad Shahid Nisar.

**Software:** Tasneem Ahmad, Muhammad Shahid Nisar.

**Supervision:** Muhammad Mudassar Maqbool.

**Validation:** Shazia Naz, Tasneem Ahmad.

**Visualization:** Shazia Naz.

**Writing – original draft:** Shazia Naz, Tasneem Ahmad.

**Writing – review & editing:** Muhammad Mudassar Maqbool, Muhammad Shahid Nisar, Hassan Mehmood, Mona S. Alwahibi, Jawaher Alkahtani.

## References

1. Weigand C. Wheat import projections towards 2050. US Wheat Assoc USA. 2011.
2. Pakistan G of. Economic Survey of Pakistan. 2019.
3. FAO. 2019. Available: [www.faostat.fao.org](http://www.faostat.fao.org)
4. Hassan G, Faiz B, Marwat KB. Effects of planting methods and tank mixed herbicides on controlling-grassy and broadleaf weeds and their effect on wheat cv. Fakhre-Sarhad. Pakistan J Weed Sci Res. 2003; 9: 1–11.
5. Fuksa P, Haki J, Kocourková D, Veselá M. Influence of weed infestation on morphological parameters of maize (*Zea mays* L.). Plant, Soil Environ. 2004. <https://doi.org/10.17221/4046-pse>
6. van Heemst HDJ. The influence of weed competition on crop yield. Agric Syst. 1985. [https://doi.org/10.1016/0308-521X\(85\)90047-2](https://doi.org/10.1016/0308-521X(85)90047-2)
7. Fahad S, Hussain S, Chauhan BS, Saud S, Wu C, Hassan S, et al. Weed growth and crop yield loss in wheat as influenced by row spacing and weed emergence times. Crop Prot. 2015. <https://doi.org/10.1016/j.cropro.2015.02.005>
8. Ayaz S, Shah P, Sharif HM, Ali I. Yield, yield components and other important agronomic traits of wheat as affected by seed rate and planting geometry. Sarhad J Agric. 1999; 15: 255–262.
9. Farooq M, Nawaz A. Weed dynamics and productivity of wheat in conventional and conservation rice-based cropping systems. Soil Tillage Res. 2014; 141: 1–9. <https://doi.org/10.1016/j.still.2014.03.012>
10. Gruber S, Pekrun C, Möhring J, Claupein W. Long-term yield and weed response to conservation and stubble tillage in SW Germany. Soil Tillage Res. 2012; 121: 49–56. <https://doi.org/10.1016/j.still.2012.01.015>
11. Khan M, Ali HH, Ali L, Rizwan MS, Mahmood A, Raza A, et al. Competitive Interactions of Wild Oat (*Avena fatua* L.) with Quality and Yield of Wheat (*Triticum aestivum* L.). Planta Daninha. 2020; 38.
12. Hussain S, Khaliq A, Bajwa AA, Matloob A, Areeb A, Ashraf U, et al. Crop growth and yield losses in wheat due to little seed canary grass infestation differ with weed densities and changes in environment. Planta Daninha. 2017; 35.
13. Safdar ME, Hayyat MS, Maajid MZ, Nadeem M, Ali A. Estimation of economic threshold of *Convolvulus arvensis* L. weed in wheat (*Triticum aestivum* L.). Pakistan J Weed Sci Res. 2019; 25: 17.
14. Khan MB, Ahmad M, Hussain M, Jabran K, Farooq S, Waqas-UI-Haq M. Allelopathic plant water extracts tank mixed with reduced doses of atrazine efficiently control *Trianthema portulacastrum* L. in *Zea mays* L. J Anim Plant Sci. 2012; 22: 339–346.
15. Saeed SA, Sadiq M, Nisar A. Effect of weed competition on wheat (*Triticum aestivum* L.). Pakistan J Agric Sci. 1984; 21: 237–241.
16. Guillemin JP, Gardarin A, Granger S, Reibel C, Munier-Jolain N, Colbach N. Assessing potential germination period of weeds with base temperatures and base water potentials. Weed Res. 2013; 53: 76–87. <https://doi.org/10.1111/wre.12000>
17. Mahajan G, Loura D, Raymond K, Chauhan BS. Influence of soil moisture levels on the growth and reproductive behaviour of *Avena fatua* and *Avena ludoviciana*. PLoS One. 2020; 15: e0234648. <https://doi.org/10.1371/journal.pone.0234648> PMID: 32645027
18. Bajwa AA, Akhter MJ, Iqbal N, Peerzada AM, Hanif Z, Manalil S, et al. Biology and management of *Avena fatua* and *Avena ludoviciana*: two noxious weed species of agro-ecosystems. Environ Sci Pollut Res. 2017; 24: 19465–19479. <https://doi.org/10.1007/s11356-017-9810-y> PMID: 28766148
19. Beckie HJ, Francis A, Hall LM. The biology of Canadian weeds. 27. *Avena fatua* L. (updated). Can J Plant Sci. 2012; 92: 1329–1357.
20. Van Wychen LR, Maxwell BD, Bussan AJ, Miller PR, Luschei EC. Wild oat (*Avena fatua*) habitat and water use in cereal grain cropping systems. Weed Sci. 2004; 52: 352–358.
21. Necajeva J, Erdman Z, Isoda-Krasovska A, Curiske J, Dudele I, Gaile L, et al. Influence of wild oat plant density on spring wheat yield. Zemdirbyste-Agriculture. 2017; 104: 209–218. <https://doi.org/10.13080/z-a.2017.104.027>

22. Jabran K, Farooq M, Hussain M, Hafeez Ur-Rehman, Ali M. Wild oat (*Avena fatua* L.) and canary grass (*Phalaris minor* Ritz.) management through allelopathy. *J Plant Prot Res.* 2010; 50: 41–44. <https://doi.org/10.2478/v10045-010-0007-3>
23. Khan I, Hassan G, Khan MI, Gul M. Effect of wild oat (*Avena fatua* L.) population and nitrogen levels on some agronomic traits of spring wheat (*Triticum aestivum* L.). *Turkish J Agric For.* 2007; 31: 91–101.
24. Khan IA, Gul H. Effect of wild oats (*Avena fatua*) densities and proportions on yield and yield components of wheat. *Pakistan J Weed Sci Res.* 2006; 12: 69–77.
25. CABI. Invasive Species Compendium Datasheet report for *Avena fatua* (wild oat). 2019.
26. Bajwa AA, Walsh M, Chauhan BS. Weed management using crop competition in Australia. *Crop Prot.* 2017; 95: 8–13.
27. Walsh MJ, Broster JC, Schwartz-Lazaro LM, Norsworthy JK, Davis AS, Tidemann BD, et al. Opportunities and challenges for harvest weed seed control in global cropping systems. *Pest Manag Sci.* 2018; 74: 2235–2245. <https://doi.org/10.1002/ps.4802> PMID: 29193725
28. Lamichane JR, Devos Y, Beckie HJ, Owen MDK, Tillie P, Messéan A, et al. Integrated weed management systems with herbicide-tolerant crops in the European Union: lessons learnt from home and abroad. *Crit Rev Biotechnol.* 2017; 37: 459–475. <https://doi.org/10.1080/07388551.2016.1180588> PMID: 27173634
29. Korres NE, Burgos NR, Travlos I, Vurro M, Gitsopoulos TK, Varanasi VK, et al. New directions for integrated weed management: Modern technologies, tools and knowledge discovery. *Advances in Agronomy.* Elsevier; 2019. pp. 243–319.
30. Abouzienna HF, Hafez OM, El-Metwally IM, Sharma SD, Singh M. Comparison of weed suppression and mandarin fruit yield and quality obtained with organic mulches, synthetic mulches, cultivation, and glyphosate. *HortScience.* 2008. <https://doi.org/10.21273/hortsci.43.3.795> PMID: 20148186
31. Swinton SM, Van Deynze B. Hoes to herbicides: Economics of evolving weed management in the United States. *Eur J Dev Res.* 2017; 29: 560–574. <https://doi.org/10.1057/s41287-017-0077-4>
32. Verma SK, Prasad SK, Kumar S, Singh SB, Singh RP, Singh Y V. Effect of mulching and herbicides on weeds, yield and economics of greengram (*Vigna radiata* L.) grown under eight-year old agrihorti system. *Res Crop.* 2017. <https://doi.org/10.5958/2348-7542.2017.00076.6>
33. Chandrakar DK, Nagre SK, Ransing DM, Singh AP. Influence of different herbicides on growth, yield and economics of lentil. *Indian J Weed Sci.* 2016; 48: 182. <https://doi.org/10.5958/0974-8164.2016.00045.9>
34. Schütte G, Eckerstorfer M, Rastelli V, Reichenbecher W, Restrepo-Vassalli S, Ruohonen-Lehto M, et al. Herbicide resistance and biodiversity: agronomic and environmental aspects of genetically modified herbicide-resistant plants. *Environmental Sciences Europe.* 2017. <https://doi.org/10.1186/s12302-016-0100-y> PMID: 28163993
35. Islam F, Wang J, Farooq MA, Khan MSS, Xu L, Zhu J, et al. Potential impact of the herbicide 2,4-dichlorophenoxyacetic acid on human and ecosystems. *Environ Int.* 2018; 111: 332–351. <https://doi.org/10.1016/j.envint.2017.10.020> PMID: 29203058
36. Banerjee H, Garai S, Sarkar S, Ghosh D, Samanta S, Mahato M. Efficacy of herbicides against canary grass and wild oat in wheat and their residual effects on succeeding greengram in coastal Bengal. *Indian J Weed Sci.* 2019. <https://doi.org/10.5958/0974-8164.2019.00052.2>
37. Menegat A, Jäck O, Gerhards R. Modelling of low input herbicide strategies for the control of wild oat in intensive winter wheat cropping systems. *Field Crop Res.* 2017. <https://doi.org/10.1016/j.fcr.2016.10.016>
38. Heap I. The International Herbicide-Resistant Weed Database. 2020. Available: <http://www.weedscience.org/Home.aspx>
39. Farooq S, Onen H, Ozaslan C, Baskin CC, Gunal H. Seed germination niche for common ragweed (*Ambrosia artemisiifolia* L.) populations naturalized in Turkey. *South African J Bot.* 2019; 123: 361–371.
40. Önen H, Farooq S, Tad S, Özaslan C, Gunal H, Chauhan BS. The influence of environmental factors on germination of Burcucumber (*Sicyos angulatus*) seeds: Implications for range expansion and management. *Weed Sci.* 2018; 66: 494–501. <https://doi.org/10.1017/wsc.2018.20>
41. Onen H, Farooq S, Gunal H, Ozaslan C, Erdem H, Huseyin Onen Hikmet Gunal, et al. Higher Tolerance to abiotic stresses and soil types may accelerate Common Ragweed (*Ambrosia artemisiifolia*) invasion. *Weed Sci.* 2017; 65: 115–127. <https://doi.org/10.1614/WS-D-16-00011.1>
42. Steel R., Torrei J, Dickey D. Principles and Procedures of Statistics A Biometrical Approach. A Biometrical Approach. 1997.
43. Shapiro SS, Wilk MB. An analysis of variance test for normality (complete samples). *Biometrika.* 1965; 52: 591–611.

44. IBM SPSS Inc. SPSS Statistics for Windows. IBM Corp Released 2012. 2012;Version 20: 1–8.
45. Chauhan BS. Germination biology of *Hibiscus tridactylites* in Australia and the implications for weed management. *Sci Rep.* 2016; 6: 26006. <https://doi.org/10.1038/srep26006> PMID: 27174752
46. Ozaslan C, Farooq S, Onen H, Ozcan S, Bukun B, Gunal H. Germination Biology of Two Invasive *Phytolacca* Species and Implications for Their Management in Arid and Semi-arid Regions. *Sci Rep.* 2017; 12: 1–12. <https://doi.org/10.1038/s41598-017-17169-5> PMID: 29208989
47. Chauhan BS, Johnson DE. Influence of tillage systems on weed seedling emergence pattern in rainfed rice. *Soil Tillage Res.* 2009; 106: 15–21. <https://doi.org/10.1016/j.still.2009.10.004>
48. Chauhan BS, Gill G, Preston C. Influence of tillage systems on vertical distribution, seedling recruitment and persistence of rigid ryegrass (*Lolium rigidum*) seed bank. *Weed Sci.* 2006; 54: 669–676. <https://doi.org/10.1614/WS-05-184R.1>
49. Kollmann J, Bañuelos MJ. Latitudinal trends in growth and phenology of the invasive alien plant *Impatiens glandulifera* (Balsaminaceae). *Divers Distrib.* 2004; 10: 377–385. <https://doi.org/10.1111/j.1366-9516.2004.00126.x>
50. Montague JL, Barrett SCH, Eckert CG. Re-establishment of clinal variation in flowering time among introduced populations of purple loosestrife (*Lythrum salicaria*, Lythraceae). *J Evol Biol.* 2008; 21: 234–245. <https://doi.org/10.1111/j.1420-9101.2007.01456.x> PMID: 18028354
51. Murdoch AJ. Environmental control of germination and emergence in *Avena fatua*. *Asp Appl Biol.* 1983; 63–69.
52. Hassanein EE, Kholosy AS, Abd-Alla MMS, Ibrahim HM. Effect of temperature degrees on seed germination and seedling vigour of different wild oat species. *Ann Agric Sci Moshtohor.* 1996; 34: 1373–1380.
53. Cousens R, Doyle CJ, Wilson BJ, Cussans GW. Modelling the economics of controlling *Avena fatua* in winter wheat. *Pestic Sci.* 1986. <https://doi.org/10.1002/ps.2780170102>
54. Aldrete A, Mexal JG. Sowing depth, media, and seed size interact to influence emergence of three pine species. *Tree Plant notes.* 2005.
55. Adkins S, Ross J. Studies in Wild Oat Seed Dormancy: I. THE role of ethylene in dormancy breakage and germination of wild oat seeds (*Avena fatua* L.). *Plant Physiol.* 1981. <https://doi.org/10.1104/pp.67.2.358> PMID: 16661675
56. Agenbag GA, de Villiers OT. The effect of nitrogen fertilizers on the germination and seedling emergence of wild oat (*A. fatua* L.) seed in different soil types. *Weed Res.* 1989. <https://doi.org/10.1111/j.1365-3180.1989.tb00908.x>
57. Miller SD, Nalewaja JD. Wild oat seed longevity and production. *Weeds Today.* 1985; 16: 14–16.
58. Stevenson FC, Johnston AM, Brandt SA, Townley-Smith L. An assessment of reduced herbicide and fertilizer inputs on cereal grain yield and weed growth. *Am J Altern Agric.* 2000; 15: 60–67. <https://doi.org/10.1017/S088918930000850X>
59. Stevenson FC, Holm FA, Kirkland KJ. Optimizing Wild oat (*Avena fatua*) control with ICIA 0604. *Weed Technol.* 2017/01/20. 2000; 14: 608–616. [https://doi.org/10.1614/0890-037X\(2000\)014\[0608:OWOAFJ\]2.0.CO;2](https://doi.org/10.1614/0890-037X(2000)014[0608:OWOAFJ]2.0.CO;2)
60. Fisher S, May M. Weed control in 1999 and comments for 2000. *Br Sugar Beet Rev.* 2000; 68: 26–30.
